# Supplementary material for: Performance of the Pooled Cohort Equations to Estimate Atherosclerotic Cardiovascular Disease Risk by Body Mass Index
Source: PubMed Central journal article supplement (PMC7596579; doi:10.1001/jamanetworkopen.2020.23242), 2020-10-29
Supplement: jamanetwopen-e2023242-s001.pdf [file jamanetwopen-e2023242-s001.pdf]

## Supplemental Online Content

Khera R, Pandey A, Ayers CR, et al. Performance of the pooled cohort equations to estimate atherosclerotic cardiovascular disease risk by body mass index. *JAMA Netw Open*. 2020;3(10):e2023242. doi:10.1001/jamanetworkopen.2020.23242

**eAppendix.** Supplemental Methods

**eFigure 1.** Study Selection Flowchart

**eFigure 2.** Calibration of the Pooled Cohort Equations by Body Mass Index Category

**eTable 1.** Characteristics of Study Participants by Study Cohorts

**eTable 2.** Number of Events and Individuals Across Obesity Classes by Body Mass Index for Groups Based on Their Estimated 10-Year Risk of Atherosclerotic Cardiovascular Disease from the Pooled Cohort Equations

**eTable 3.** Likelihood Ratio Statistic for Model Performance for the Pooled Cohort Equations, Overall and Among Strata Based on Obesity Class and Cohorts

**eTable 4.** Calibration of the Pooled Cohort Equations Stratified by Sex and Race

**eTable 5.** Sensitivity Analyses

**eTable 6.** Association of Obesity-Specific Measures With ASCVD Events in Race- and Sex-Specific Subgroups

**eTable 7.** Association Between Obesity-Specific Measures and Incidence of ASCVD in Models That Account for Competing Risk of Non-ASCVD Mortality

**eTable 8.** Association of Obesity-Specific Measures With ASCVD Events With Lipid Components Removed From the PCE

**eTable 9.** Net Reclassification Improvement With Addition of Obesity-Specific Markers to the PCE Recalibrated to the Data

This supplemental material has been provided by the authors to give readers additional information about their work.

## **eAppendix.** Supplemental Methods

### **Assessment of the distribution of obesity-related variables added to PCE model**

We evaluated skewness and kurtosis for body mass index (BMI), waist circumference and high sensitivity C-reactive protein (hsCRP) which were all below 2. Next we, plotted Martingale residuals against the value of the covariate for each subject and fit a LOESS regression to the plot. We then computed the p-value of a Kolmogorov-type supremum test based on a sample of 1,000 simulated residual patterns. For waist circumference, this p-value is 0.339, indicating that all of the 1,000 simulated realizations have an absolute maximum exceeding that of the observed cumulative Martingale residual process. Similarly, for BMI, the corresponding p-values of 0.201 and for hsCRP of 0.132 justified their inclusion as linear terms in our models.

### **Assessment of likelihood ratios**

Parameter estimates in the Cox proportional hazard model were obtained by maximizing the partial likelihood function. Cox and others have shown that this partial log-likelihood can be treated as an ordinary log-likelihood to derive valid (partial) maximum likelihood estimation of the beta coefficients. These likelihood ratios are useful measures of overall model fit, especially when comparing other models. The likelihood function is the product of the probability density functions evaluated at the observed data values.

**eFigure 1. Study Selection Flowchart**

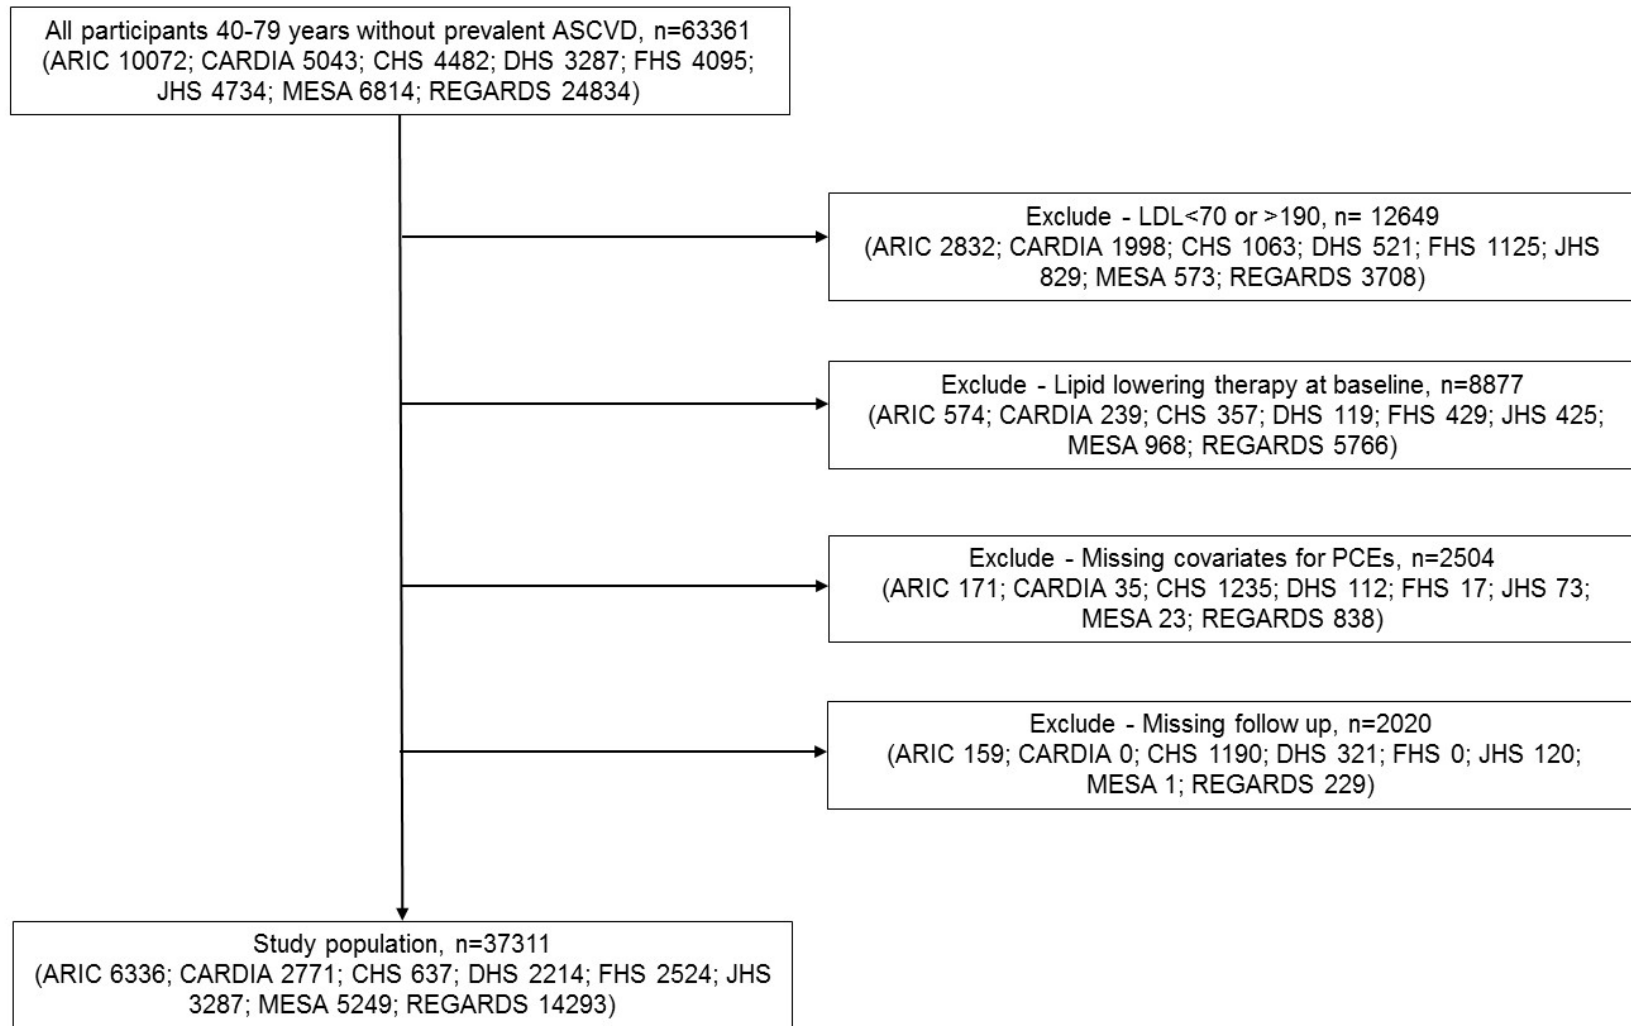

**eFigure 2.** Calibration of the Pooled Cohort Equations by Body Mass Index Category

Rates of events predicted by the Pooled Cohort Equations compared with rates of events observed in the study, across deciles of predicted risk, by BMI category. P-values are for Nam-D'Agostino  $\chi^2$  goodness-of-fit test; a non-significant  $\chi^2$  (p-value>0.05) indicates good calibration. ASCVD = atherosclerotic cardiovascular disease, BMI = body mass index.

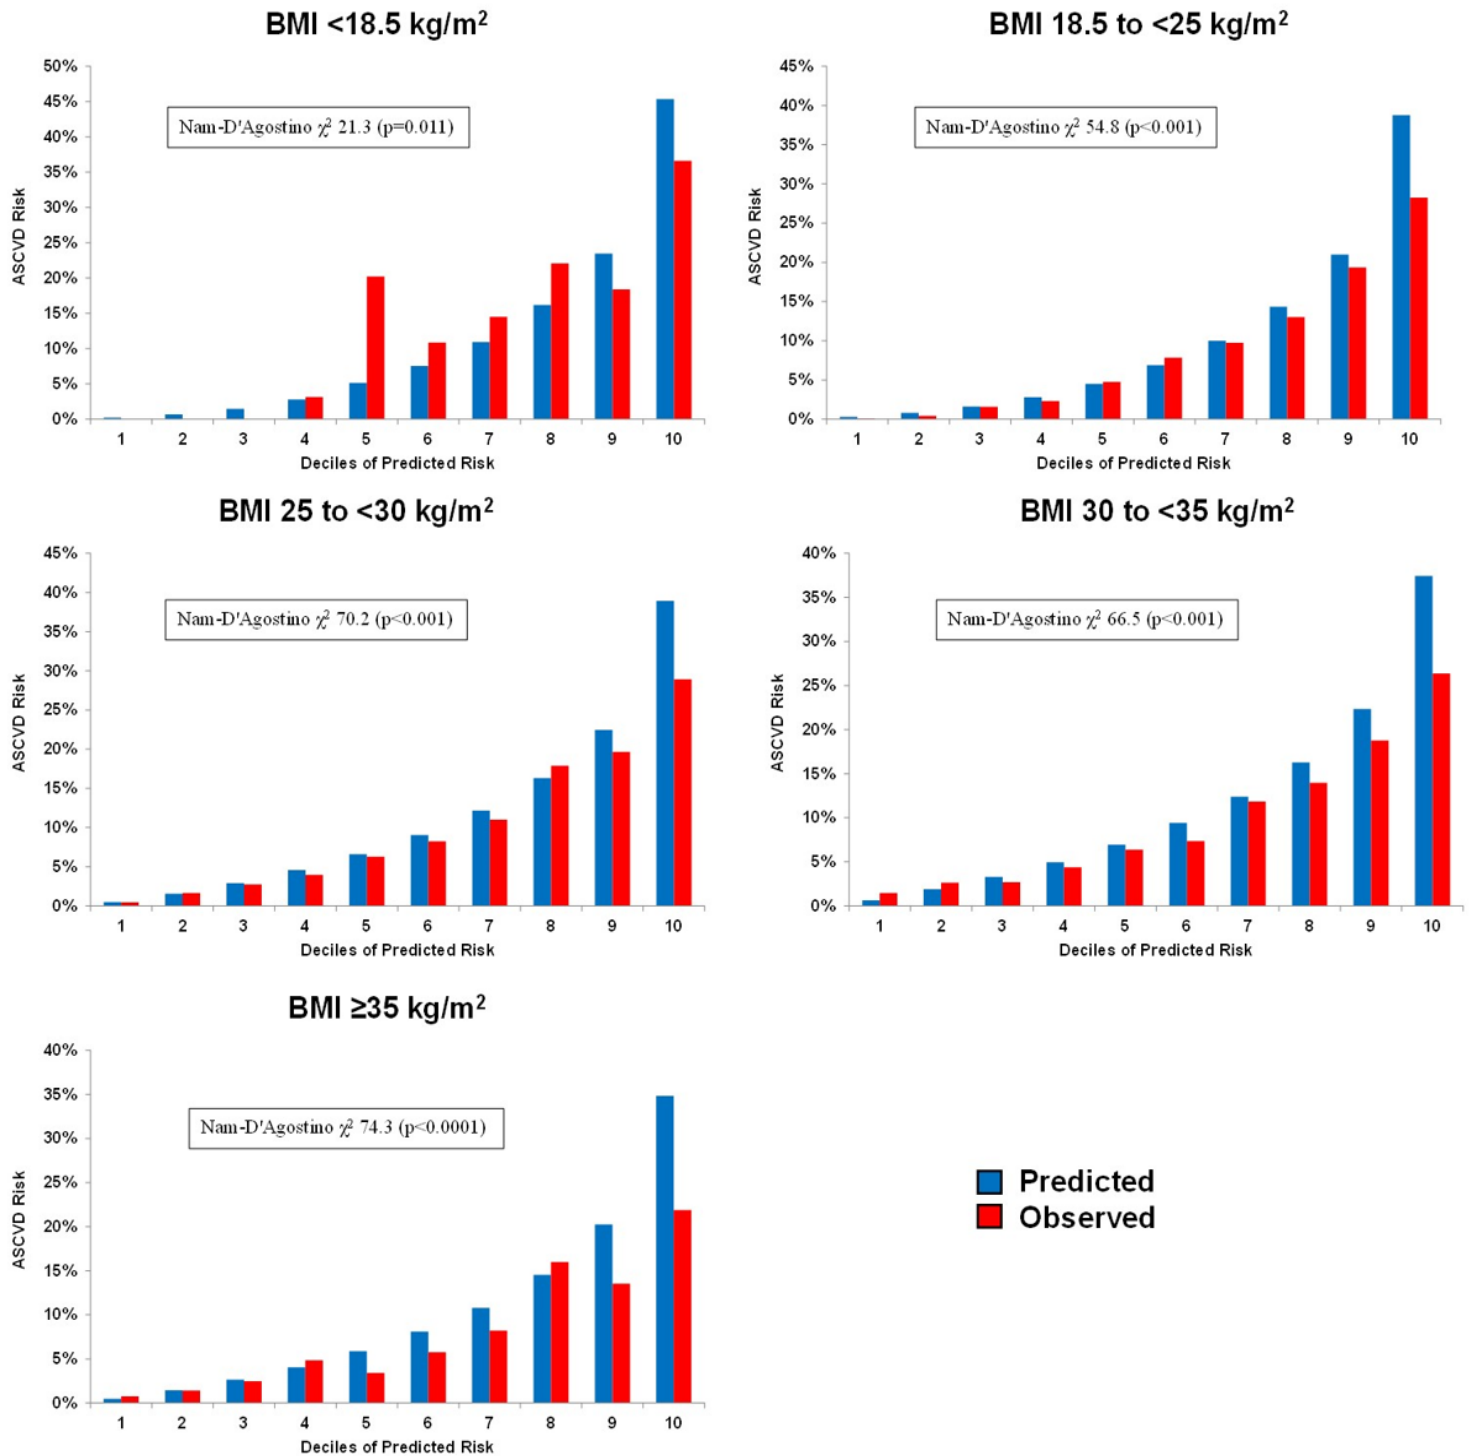

**eTable 1.** Characteristics of Study Participants by Study Cohorts

| Characteristics                                     | Cohorts            |                |                |                        |                 |                  |                  |                |
|-----------------------------------------------------|--------------------|----------------|----------------|------------------------|-----------------|------------------|------------------|----------------|
|                                                     | Derivation cohorts |                |                | Non-derivation cohorts |                 |                  |                  |                |
|                                                     | ARIC               | CARDIA         | CHS            | DHS                    | FHS             | JHS              | MESA             | REGARDS        |
|                                                     | 6336               | 2771           | 637            | 2214                   | 2524            | 3287             | 5249             | 14293          |
| Study dates                                         | 1996-2013          | 2005-2016      | 1997-2015      | 2000-2013              | 2002-2015       | 2000-2015        | 2000-2014        | 2003-2015      |
| Age, mean (SD), years                               | 63.1 (5.7)         | 45.1 (3.6)     | 69.9 (3.7)     | 43.2 (9.7)             | 45.9 (8.3)      | 53.3 (12.8)      | 61.5 (10.3)      | 63.6 (9.6)     |
| Men, n (%)                                          | 2479 (39.1)        | 1141 (41.2)    | 217 (34.1)     | 981 (44.3)             | 1123 (44.5)     | 1175 (35.8)      | 2486 (47.4)      | 5812 (40.7)    |
| Black race, n (%)                                   | 1151 (18.2)        | 1271 (45.9)    | 68 (10.7)      | 1073 (48.5)            | 3 (0.1)         | 3287 (100)       | 1419 (27.0)      | 6019 (42.1)    |
| BMI, kg/m <sup>2</sup>                              |                    |                |                |                        |                 |                  |                  |                |
| Mean (SD)                                           | 28.7 (5.7)         | 29.3 (6.9)     | 26.9 (4.3)     | 29.6 (6.8)             | 27.6 (5.5)      | 31.8 (7.3)       | 28.2 (5.5)       | 29.0 (6.2)     |
| BMI categories, n (%)                               |                    |                |                |                        |                 |                  |                  |                |
| <18.5                                               | 44 (0.7)           | 20 (0.7)       | 6 (0.9)        | 26 (1.2)               | 27 (1.1)        | 16 (0.5)         | 50 (1.0)         | 171 (1.2)      |
| 18.5 to <25                                         | 1665 (26.3)        | 776 (28)       | 221 (34.7)     | 572 (25.8)             | 872 (34.5)      | 470 (14.3)       | 1538 (29.3)      | 3823 (26.7)    |
| 25 to <30                                           | 2464 (38.9)        | 936 (33.8)     | 285 (44.7)     | 740 (33.4)             | 930 (36.8)      | 1064 (32.4)      | 2021 (38.5)      | 5161 (36.1)    |
| 30 to <35                                           | 1367 (21.6)        | 536 (19.3)     | 96 (15.1)      | 460 (20.8)             | 447 (17.7)      | 826 (25.1)       | 1066 (20.3)      | 2985 (20.9)    |
| ≥35                                                 | 796 (12.6)         | 503 (18.2)     | 29 (4.6)       | 416 (18.8)             | 248 (9.8)       | 911 (27.7)       | 574 (10.9)       | 2153 (15.1)    |
| Systolic BP, mean (SD), mmHg                        | 127.2 (18.9)       | 115.9 (15)     | 131.1 (20)     | 123.6 (17.6)           | 115.6 (14.2)    | 126.5 (16.7)     | 126.4 (21.2)     | 126.3 (16.5)   |
| Comorbidities                                       |                    |                |                |                        |                 |                  |                  |                |
| Hypertension, n (%)                                 | 2565 (40.5)        | 369 (13.3)     | 318 (49.9)     | 299 (13.5)             | 284 (11.2)      | 1424 (43.3)      | 1688 (32.2)      | 6161 (43.1)    |
| Diabetes, n (%)                                     | 687 (10.8)         | 152 (5.5)      | 61 (6.4)       | 181 (8.2)              | 52 (2.1)        | 472 (14.4)       | 543 (10.3)       | 1963 (13.7)    |
| Smoking, n (%)                                      | 872 (13.8)         | 512 (18.5)     | 32 (5.0)       | 596 (26.9)             | 264 (10.5)      | 396 (12.0)       | 686 (13.1)       | 2057 (14.4)    |
| Serum cholesterol                                   |                    |                |                |                        |                 |                  |                  |                |
| Total, mean (SD), mg/dL                             | 201.0 (30.2)       | 189.0 (28.9)   | 203.8 (35.4)   | 186.2 (32.9)           | 191.8 (28.6)    | 198.1 (31.8)     | 196.7 (29.9)     | 200.9 (31.5)   |
| HDL, mean (SD), mg/dL                               | 51.2 (16.6)        | 54.5 (15.8)    | 55.7 (14.5)    | 49.1 (13.8)            | 60.2 (17.3)     | 52 (14.4)        | 51.2 (14.8)      | 53.7 (16.4)    |
| Waist circumference, mean (SD), cm                  | 101.5 (14.8)       | 91.1 (14.9)    | 91.8 (12.6)    | 99 (16.3)              | 95.9 (14.6)     | 100.1 (16.4)     | 97.6 (14.4)      | 94.1 (15.2)    |
| High sensitivity C-reactive protein, mean (SD) mg/L | 2.5 (1.1, 5.5)     | 1.1 (0.5, 3.1) | 1.6 (0.8, 2.8) | 2.7 (1.2, 6.4)         | 1.0 (0.4, 2.6)  | 0.3 (0.1, 0.6)   | 1.9 (0.8, 4.3)   | 2.2 (1.0, 5.1) |
| Follow-up, median (IQR), years                      | 15.8 (13.1-16.7)   | 9.0 (8.7-9.3)  | 7.7 (3.5-12.4) | 11.4 (10.9-11.8)       | 10.6 (9.3-11.6) | 11.8 (10.8-12.6) | 13.0 (11.0-13.7) | 9.0 (5.7-10.9) |

|                                            |            |           |             |            |           |           |             |             |
|--------------------------------------------|------------|-----------|-------------|------------|-----------|-----------|-------------|-------------|
| Predicted 10-year ASCVD risk, mean (SD), % | 11.9 (9.6) | 2.5 (3.2) | 16.7 (10.6) | 4.2 (6.3)  | 2.1 (2.9) | 9.1 (9.6) | 12.9 (13.0) | 14.3 (12.9) |
| Observed 10-year ASCVD event rates (%)     | 819 (12.9) | 58 (2.1)  | 401 (62.9)  | 119 (5.4)  | 39 (1.6)  | 221 (6.7) | 504 (9.6)   | 1548 (10.8) |
| CHD death, n (%)                           | 153 (1.6)  |           |             | 429 (1.6)  |           |           |             |             |
| Non-fatal myocardial infarction, n (%)     | 706 (7.2)  |           |             | 821 (3.0)  |           |           |             |             |
| Fatal or non-fatal stroke, n (%)           | 421 (4.3)  |           |             | 1179 (4.3) |           |           |             |             |

Abbreviations: ASCVD – atherosclerotic cardiovascular disease, BP – blood pressure, CHD – coronary heart disease, cm – centimeters, HDL – high-density lipoprotein, hs – high-sensitivity, IQR – interquartile range, mg/dL – milligram per deciliter, mmHg – millimeters of mercury, SD – standard deviation

**eTable 2.** Number of Events and Individuals Across Obesity Classes by Body Mass Index for Groups Based on Their Estimated 10-Year Risk of Atherosclerotic Cardiovascular Disease from the Pooled Cohort Equations

| Predicted risk,<br>% | Body Mass Index (kg/m <sup>2</sup> ) |     |             |      |           |       |           |      |        |      |
|----------------------|--------------------------------------|-----|-------------|------|-----------|-------|-----------|------|--------|------|
|                      | <18.5                                |     | 18.5 to <25 |      | 25 to <30 |       | 30 to <35 |      | ≥35    |      |
|                      | Events                               | N   | Events      | N    | Events    | N     | Events    | N    | Events | N    |
| <5                   | 4                                    | 320 | 188         | 9482 | 238       | 10136 | 148       | 5510 | 130    | 4586 |
| 5-7.5                | 14                                   | 82  | 166         | 1968 | 210       | 3174  | 128       | 1866 | 58     | 1314 |
| 7.5-20               | 30                                   | 186 | 724         | 5262 | 1238      | 8932  | 680       | 5360 | 460    | 3654 |
| ≥20                  | 26                                   | 132 | 746         | 3162 | 1234      | 4960  | 672       | 2830 | 324    | 1706 |

**eTable 3.** Likelihood Ratio Statistic for Model Performance for the Pooled Cohort Equations, Overall and Among Strata Based on Obesity Class and Cohorts

| Group                                        | Likelihood ratio |                   |                              |
|----------------------------------------------|------------------|-------------------|------------------------------|
|                                              | Overall          | ARIC, CARDIA, CHS | DHS, MESA, FHS, JHS, REGARDS |
| Overall                                      | 1448.8785        | 384.3265          | 1086.3575                    |
| BMI category (BMI range, kg/m <sup>2</sup> ) |                  |                   |                              |
| Underweight (<18.5)                          | 22.6268          | 3.4569            | 19.5861                      |
| Normal (18.5 to <25)                         | 389.4362         | 69.0026           | 324.4546                     |
| Overweight (25 to <30)                       | 566.6078         | 169.6491          | 410.585                      |
| Mild Obesity (30 to <35)                     | 278.0843         | 78.5087           | 200.4981                     |
| Moderate to Severe Obesity (≥35)             | 169.5841         | 52.5395           | 121.7949                     |



**eTable 4.** Calibration of the Pooled Cohort Equations Stratified by Sex and Race

| Group                                        | E/O ratio            |                      |                      |                      |
|----------------------------------------------|----------------------|----------------------|----------------------|----------------------|
|                                              | Men                  | Women                | Black                | Non-Black            |
| Overall                                      | 1.279 (1.228, 1.332) | 1.151 (1.108, 1.197) | 1.273 (1.218, 1.328) | 1.179 (1.14, 1.228)  |
| BMI category (BMI range, kg/m <sup>2</sup> ) |                      |                      |                      |                      |
| Underweight (<18.5)                          | 1.832 (0.965, 3.426) | 0.857 (0.625, 1.151) | 1.841 (0.978, 3.339) | 0.866 (0.637, 1.234) |
| Normal (18.5 to <25)                         | 1.244 (1.148, 1.337) | 1.174 (1.073, 1.274) | 1.170 (1.054, 1.304) | 1.234 (1.154, 1.312) |
| Overweight (25 to <30)                       | 1.211 (1.146, 1.284) | 1.112 (1.046, 1.191) | 1.253 (1.163, 1.352) | 1.130 (1.070, 1.202) |
| Mild Obesity (30 to <35)                     | 1.391 (1.277, 1.522) | 1.094 (1.006, 1.205) | 1.309 (1.2, 1.428)   | 1.182 (1.087, 1.287) |
| Moderate to Severe Obesity (≥35)             | 1.521 (1.315, 1.766) | 1.296 (1.174, 1.432) | 1.375 (1.247, 1.518) | 1.33 (1.17, 1.512)   |

Data represent mean expected to observed (E/O) risk ratio with corresponding 95% confidence intervals. A ratio of 1 indicates perfect calibration across the full spectrum of risk, and ratios above 1 and below 1 indicate average over- and under-estimation of risk, respectively.

**eTable 5.** Sensitivity Analyses After Stratifying by Median Age of the Participants at First Visit and Excluding Individuals With Subsequent Statin/lipid-lowering Therapy Use

| Age of participants at first visit                                                                                                                                                                                                                                                                    | Above median         |                      | Below median         |                      |
|-------------------------------------------------------------------------------------------------------------------------------------------------------------------------------------------------------------------------------------------------------------------------------------------------------|----------------------|----------------------|----------------------|----------------------|
|                                                                                                                                                                                                                                                                                                       | C-statistic          | E/O ratio            | C-statistic          | E/O ratio            |
| Overall                                                                                                                                                                                                                                                                                               | 0.666 (0.656, 0.677) | 1.203 (1.167, 1.245) | 0.766 (0.749, 0.784) | 1.207 (1.139, 1.288) |
| BMI category (BMI range, kg/m <sup>2</sup> )                                                                                                                                                                                                                                                          |                      |                      |                      |                      |
| Underweight (<18.5)                                                                                                                                                                                                                                                                                   | 0.813 (0.778, 0.848) | 0.965 (0.740, 1.328) | 0.905 (0.839, 0.972) | 0.692 (0.415, 1.79)  |
| Normal (18.5 to <25)                                                                                                                                                                                                                                                                                  | 0.721 (0.680, 0.723) | 1.193 (1.124, 1.274) | 0.763 (0.733, 0.793) | 1.206 (1.05, 1.425)  |
| Overweight (25 to <30)                                                                                                                                                                                                                                                                                | 0.651 (0.549, 0.752) | 1.158 (1.104, 1.213) | 0.756 (0.716, 0.795) | 1.166 (1.049, 1.284) |
| Mild Obesity (30 to <35)                                                                                                                                                                                                                                                                              | 0.673 (0.657, 0.690) | 1.237 (1.145, 1.324) | 0.674 (0.654, 0.694) | 1.205 (1.068, 1.365) |
| Moderate to Severe Obesity (≥35)                                                                                                                                                                                                                                                                      | 0.653 (0.622, 0.685) | 1.355 (1.231, 1.489) | 0.651 (0.627, 0.675) | 1.328 (1.176, 1.529) |
| <b>Excluding interim statin/lipid lowering therapy use</b>                                                                                                                                                                                                                                            |                      |                      |                      |                      |
|                                                                                                                                                                                                                                                                                                       | C-statistic          | E/O ratio            |                      |                      |
| Overall                                                                                                                                                                                                                                                                                               | 0.762 (0.754, 0.770) | 1.231 (1.202, 1.276) |                      |                      |
| BMI category (BMI range, kg/m <sup>2</sup> )                                                                                                                                                                                                                                                          |                      |                      |                      |                      |
| Underweight (<18.5)                                                                                                                                                                                                                                                                                   | 0.774 (0.709, 0.839) | 1.039 (0.819, 1.428) |                      |                      |
| Normal (18.5 to <25)                                                                                                                                                                                                                                                                                  | 0.780 (0.766, 0.795) | 1.226 (1.162, 1.315) |                      |                      |
| Overweight (25 to <30)                                                                                                                                                                                                                                                                                | 0.769 (0.756, 0.781) | 1.197 (1.143, 1.26)  |                      |                      |
| Mild Obesity (30 to <35)                                                                                                                                                                                                                                                                              | 0.739 (0.720, 0.759) | 1.238 (1.16, 1.329)  |                      |                      |
| Moderate to Severe Obesity (≥35)                                                                                                                                                                                                                                                                      | 0.741 (0.716, 0.765) | 1.355 (1.252, 1.504) |                      |                      |
| Data represent C-statistic and mean expected to observed (E/O) risk ratio with corresponding 95% confidence intervals. A ratio of 1 indicates perfect calibration across the full spectrum of risk, and ratios above 1 and below 1 indicate average over- and under-estimation of risk, respectively. |                      |                      |                      |                      |

**eTable 6.** Association of Obesity-Specific Measures With ASCVD Events in Race- and Sex-Specific Subgroups

|                                                      | <b>Men</b>            | <b>Women</b>         | <b>Black</b>          | <b>Non-Black</b>      |
|------------------------------------------------------|-----------------------|----------------------|-----------------------|-----------------------|
| <b>Obesity-specific measure</b>                      |                       |                      |                       |                       |
| BMI                                                  | 0.98 (0.93, 1.04)     | 0.99 (0.94, 1.06)    | 0.95 (0.89, 1.02)     | 1.02 (0.97, 1.07)     |
| Waist circumference                                  | 1.03 (0.98, 1.08)     | 1.10 (1.04, 1.17)    | 1.04 (0.98, 1.10)     | 1.09 (1.03, 1.15)     |
| hs-CRP                                               | 1.06 (1.04, 1.09)     | 1.07 (1.02, 1.11)    | 1.06 (1.02, 1.10)     | 1.09 (1.06, 1.13)     |
| <b>All-together</b>                                  |                       |                      |                       |                       |
| BMI                                                  | 0.86 (0.77, 0.95)     | 0.77 (0.69, 0.86)    | 0.79 (0.71, 0.89)     | 0.85 (0.77, 0.93)     |
| waist circumference                                  | 1.16 (1.06, 1.28)     | 1.33 (1.21, 1.48)    | 1.23 (1.11, 1.36)     | 1.23 (1.12, 1.36)     |
| hs-CRP                                               | 1.06 (1.04, 1.09)     | 1.06 (1.02, 1.11)    | 1.06 (1.02, 1.10)     | 1.09 (1.06, 1.13)     |
| <b>Model discrimination (C-statistic and 95% CI)</b> |                       |                      |                       |                       |
| Overall                                              | 0.740 (0.720, 0.760)  | 0.770 (0.752, 0.788) | 0.748 (0.725, 0.771)  | 0.774 (0.758, 0.790)  |
| Overall + BMI                                        | 0.741 (0.721, 0.760)  | 0.770 (0.752, 0.788) | 0.748 (0.726, 0.771)  | 0.774 (0.758, 0.790)  |
| Overall + waist circumference                        | 0.739 (0.720, 0.759)  | 0.768 (0.750, 0.786) | 0.747 (0.724, 0.770)  | 0.772 (0.756, 0.789)  |
| Overall + hs-CRP                                     | 0.742 (0.722, 0.762)* | 0.771 (0.753, 0.789) | 0.749 (0.726, 0.771)  | 0.776 (0.760, 0.792)* |
| Overall + BMI + waist circumference + hs-CRP         | 0.742 (0.722, 0.762)* | 0.768 (0.750, 0.786) | 0.745 (0.727, 0.772)* | 0.774 (0.757, 0.790)  |

Data represent the hazard ratio (95% CI) for each obesity-specific measure (per 1-standard deviation change in the exposure) in a model with the standard PCE as a predictor and incident ASCVD as an outcome, and the model discrimination (C-statistic) with adding each of these obesity specific measures to a standard PCE based risk-prediction model.\*P<0.05 when c-statistic compared with c-statistic from standard PCE model

**eTable 7.** Association Between Obesity-specific Measures and Incidence of ASCVD in Models That Account for Competing Risk of Non-ASCVD Mortality\*

| <b>Obesity-specific measures</b>    | <b>Hazard ratio (95% confidence interval),<br/>for one standard deviation change in<br/>measure</b> |
|-------------------------------------|-----------------------------------------------------------------------------------------------------|
| Body mass index                     | 1.00 (0.96, 1.04)                                                                                   |
| Waist circumference                 | 1.07 (1.03, 1.12)                                                                                   |
| High-sensitivity C-reactive protein | 1.04 (1.02, 1.06)                                                                                   |
| Combined model                      |                                                                                                     |
| Body mass index                     | 0.84 (0.78, 0.90)                                                                                   |
| Waist circumference                 | 1.23 (1.15, 1.32)                                                                                   |
| High-sensitivity C-reactive protein | 1.04 (1.02, 1.06)                                                                                   |

\*Models with variables included in the pooled cohort equations refit to our data set.

**eTable 8.** Association of Obesity-Specific Measures With ASCVD Events With Lipid Components Removed From the PCE

| Obesity-specific measure                             | Overall                  | ARIC, CARDIA,<br>CHS  | DHS, FHS, JHS, MESA,<br>REGARDS |
|------------------------------------------------------|--------------------------|-----------------------|---------------------------------|
| <b>Hazard Ratio and 95% CI</b>                       |                          |                       |                                 |
| BMI                                                  | 1.006 (1.000, 1.012)     | 1.012 (1.001, 1.023)  | 1.003 (0.996, 1.011)            |
| Waist circumference                                  | 1.007 (1.004, 1.009)     | 1.006 (1.002, 1.011)  | 1.007 (1.004, 1.010)            |
| hsCRP                                                | 1.011 (1.008, 1.014)     | 1.020 (1.013, 1.027)  | 1.009 (1.005, 1.013)            |
| <b>Model discrimination (C-statistic and 95% CI)</b> |                          |                       |                                 |
| Overall (standard PCE components)                    | 0.760 (0.753, 0.767)     | 0.758 (0.746, 0.770)  | 0.761 (0.752, 0.770)            |
| Overall + BMI*                                       | 0.765 (0.757, 0.772)     | 0.760 (0.748, 0.772)  | 0.768 (0.758, 0.777)            |
| Overall + waist circumference*                       | 0.763 (0.755, 0.770)     | 0.756 (0.744, 0.768)  | 0.767 (0.757, 0.776)            |
| Overall + hsCRP*                                     | 0.767 (0.759, 0.774)     | 0.760 (0.748, 0.772)  | 0.770 (0.760, 0.779)            |
| Overall + BMI + waist circumference +<br>hsCRP*      | 0.764 (0.757,<br>0.772)* | 0.754 (0.742, 0.767)* | 0.770 (0.761, 0.780)*           |

Data represent the hazard ratio (95% CI) for each obesity-specific measure (per 1-standard deviation change in the exposure) in a model with the non-lipid PCE covariates as predictors and incident ASCVD as an outcome, and the model discrimination (c-statistic) with adding each of these obesity specific measures to a PCE based risk-prediction model without lipid components. BMI = body mass index; hsCRP = high sensitivity C-reactive protein

\*P>0.05 when c-statistic compared with c-statistic from standard PCE model

**eTable 9.** Net Reclassification Improvement With Addition of Obesity-Specific Makers to the PCE Recalibrated to the Data Threshold of risk set at 7.5%.

|                                                   | Increased Risk | Decreased Risk | Net Correctly Reclassified | NRI   | NRI p-value |
|---------------------------------------------------|----------------|----------------|----------------------------|-------|-------------|
| <b>PCEs + Body mass index</b>                     |                |                |                            |       |             |
| Event                                             | 10             | 10             | 0                          |       |             |
| No event                                          | 70             | 50             | 0.000                      | 0.000 | 0.667       |
| <b>PCEs + Waist circumference</b>                 |                |                |                            |       |             |
| Event                                             | 115            | 95             | 0.001                      |       |             |
| No event                                          | 735            | 805            | 0.000                      | 0.002 | 0.072       |
| <b>PCEs + High-sensitivity C-Reactive Protein</b> |                |                |                            |       |             |
| Event                                             | 150            | 125            | 0.002                      |       |             |
| No event                                          | 1025           | 1245           | 0.001                      | 0.003 | 0.007       |
| <b>PCEs + All three measures</b>                  |                |                |                            |       |             |
| Event                                             | 235            | 240            | 0.000                      |       |             |
| No event                                          | 1495           | 2035           | 0.003                      | 0.003 | 0.031       |
